# Supplementary material for: Interpretation of convolutional neural networks reveals crucial sequence features involving in transcription during fiber development
Source: Springer Nature journal article supplement (doi:10.1186/s12859-022-04619-9), 2022-03-15

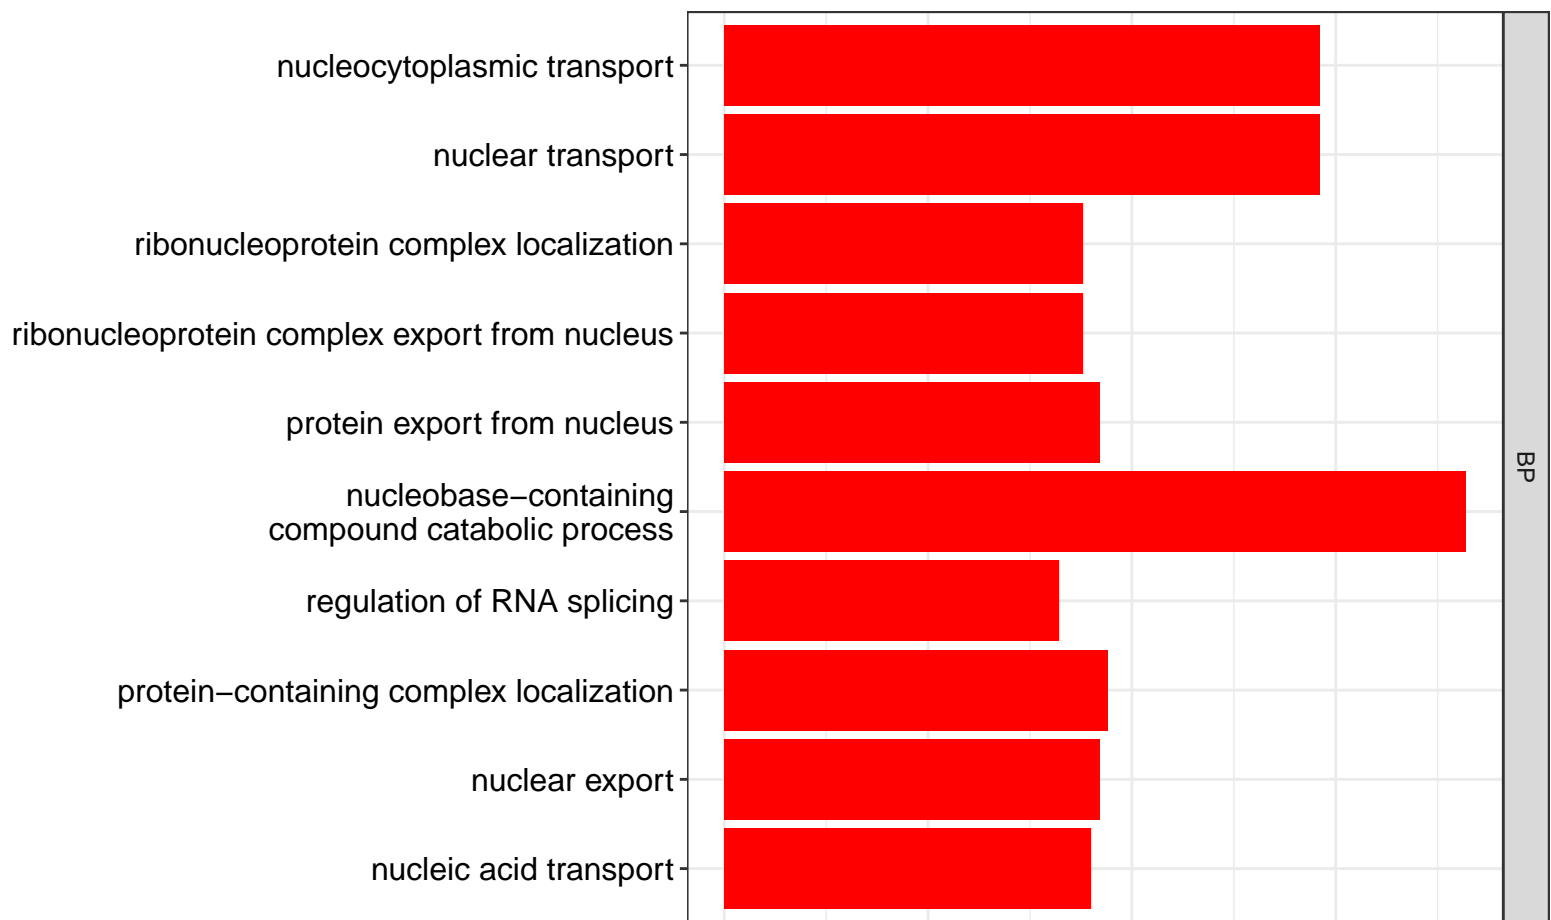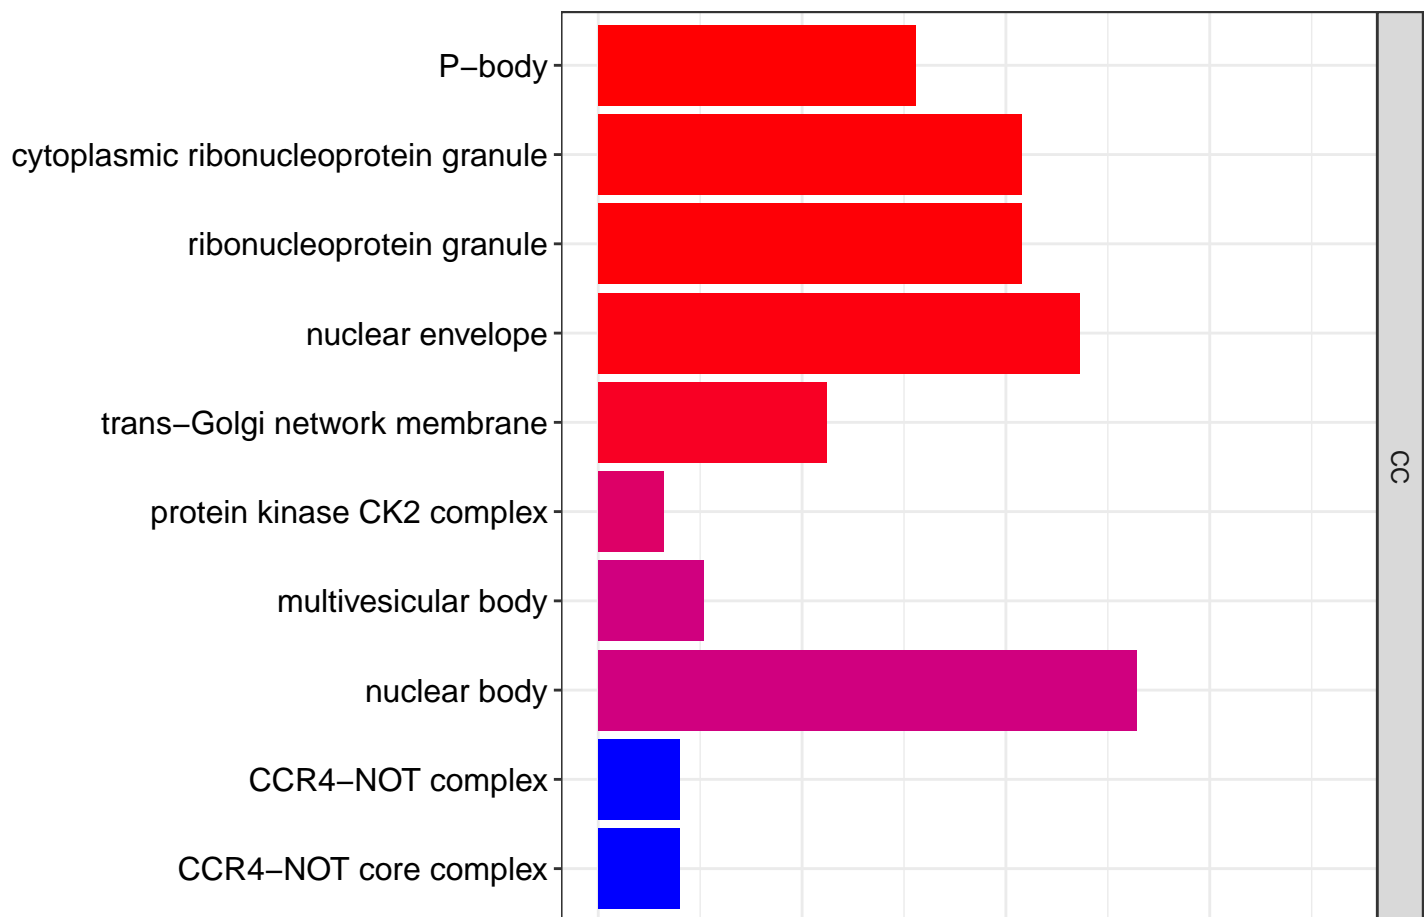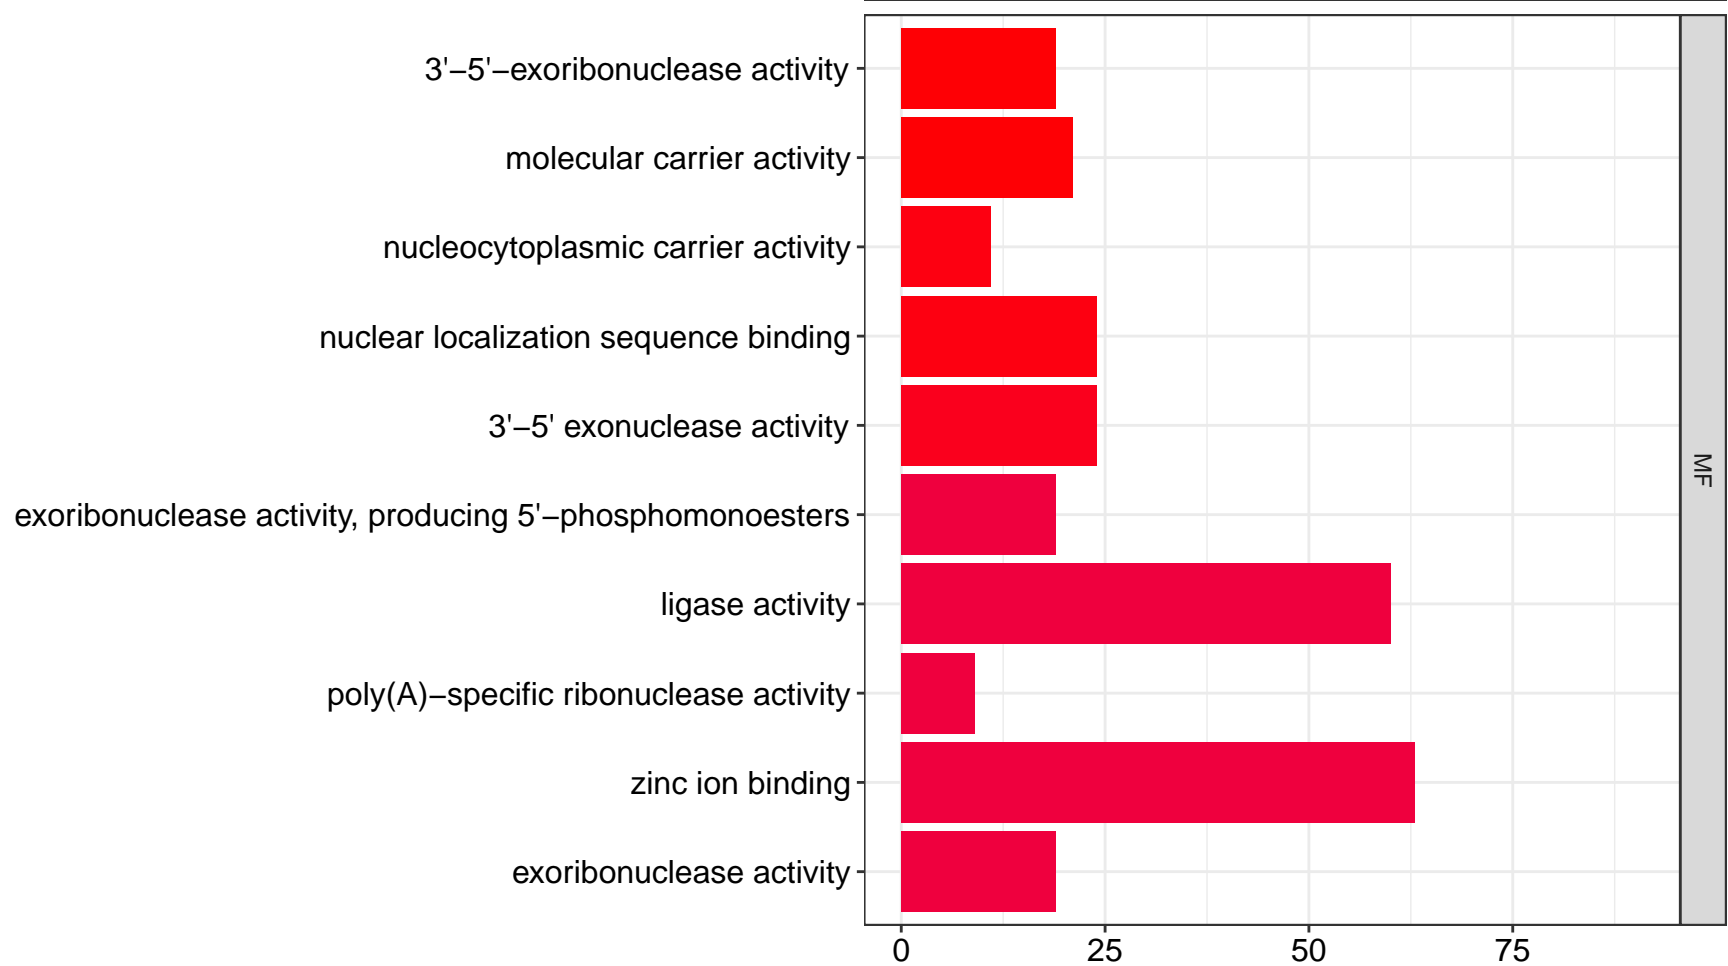

Supplement: 12859_2022_4619_MOESM34_ESM.pdf [file 12859_2022_4619_MOESM34_ESM.pdf]
